# Supplementary material for: Renal Effects of Angiotensin-Converting Enzyme Inhibitors and Angiotensin Receptor Blockers in Patients with Liver Cirrhosis: A Nationwide Cohort Study
Source: Hindawi journal article supplement (doi:10.1155/2019/1743290), 2019-10-10
Supplement: f1 [file 1743290.f1.pdf]

## Supplementary Materials

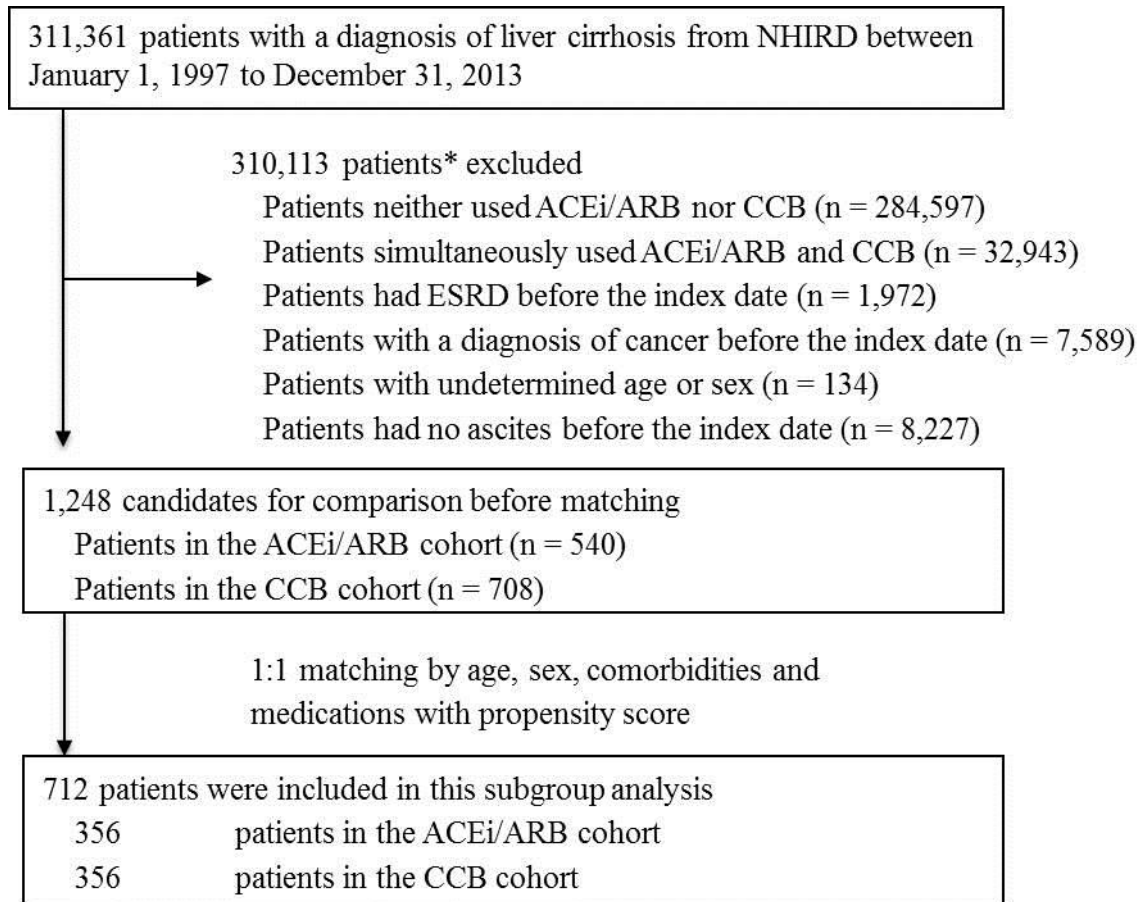

FIGURE S1: Flowchart of the enrollment process for cirrhotic patients with ascites.

\*more than one exclusion criteria could overlap in a patient.

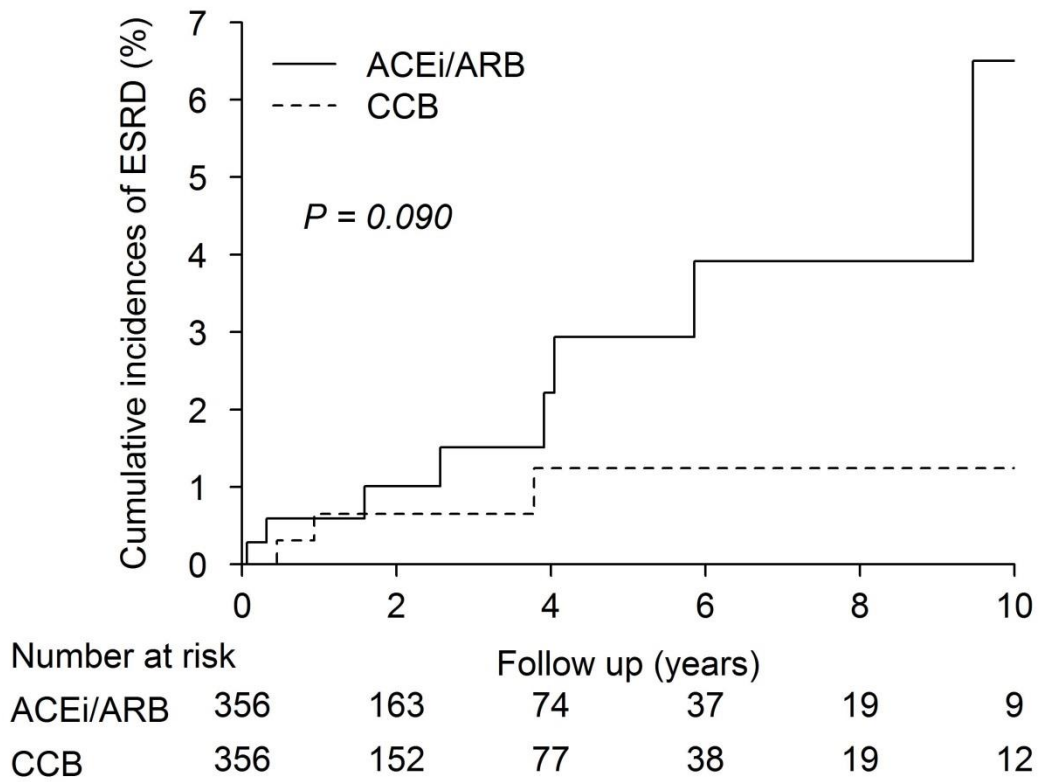

FIGURE S2: Cumulative incidence of ESRD in cirrhotic patients with ascites that was analyzed using the modified log-rank test with death adjusted as a competing risk event.

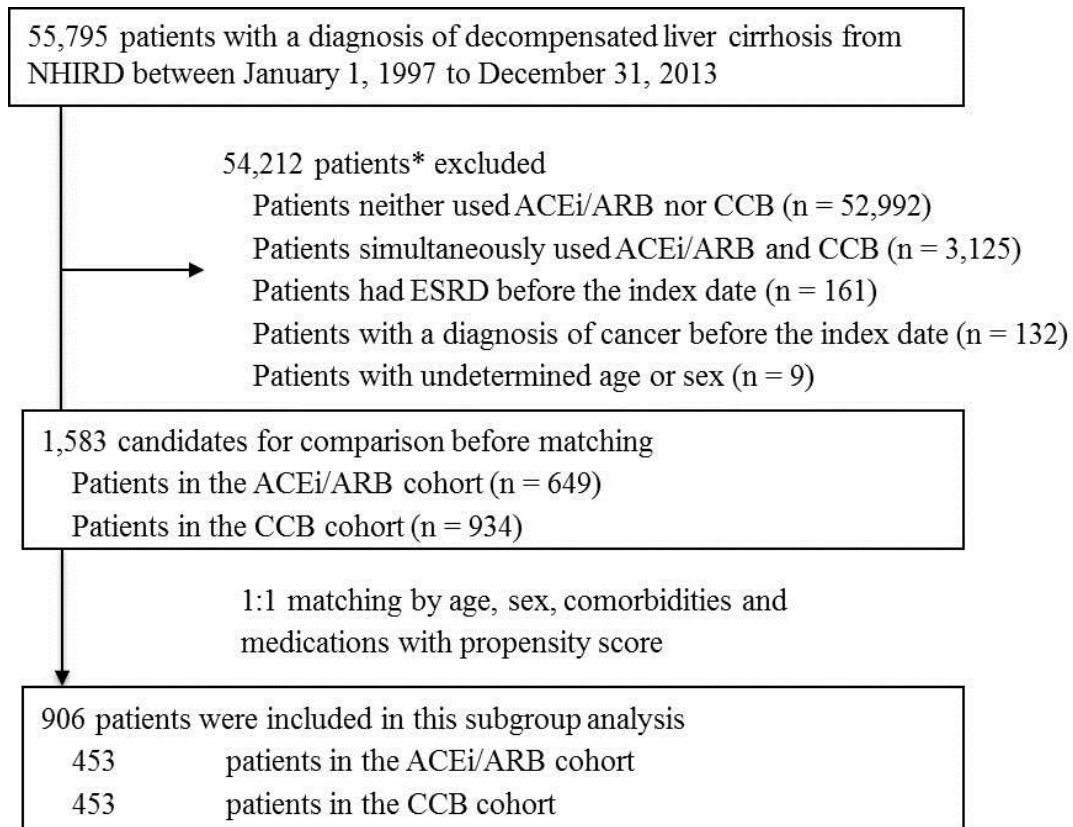

FIGURE S3: Flowchart of the enrollment process for patients with decompensated liver cirrhosis. \*more than one exclusion criteria could overlap in a patient.

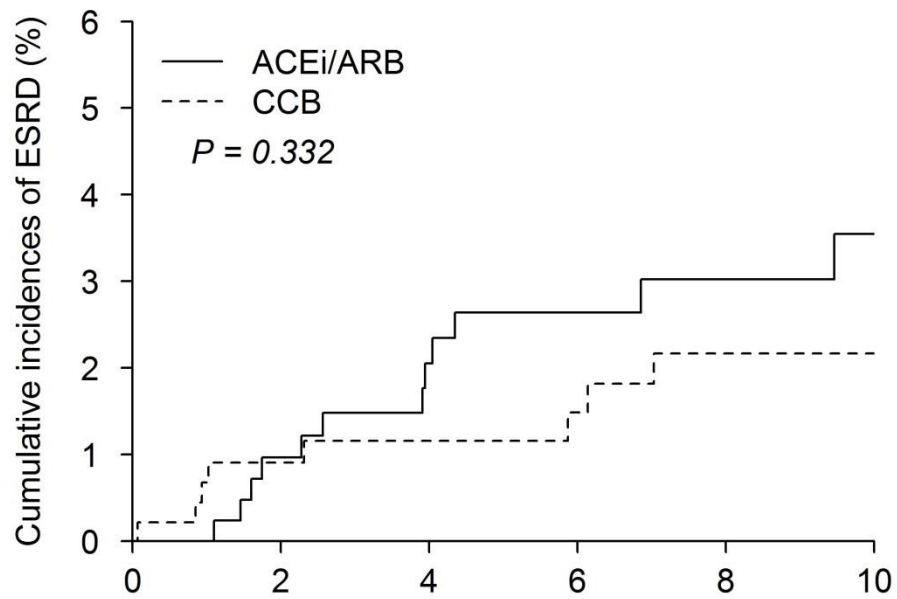

|                | Follow up (years) |     |     |     |    |    |
|----------------|-------------------|-----|-----|-----|----|----|
| Number at risk | 0                 | 2   | 4   | 6   | 8  | 10 |
| ACEi/ARB       | 453               | 299 | 185 | 111 | 50 | 29 |
| CCB            | 453               | 299 | 177 | 107 | 54 | 23 |

FIGURE S4: Cumulative incidence of ESRD in patients with decompensated liver cirrhosis that was analyzed using the modified log-rank test with death adjusted as a competing risk event.

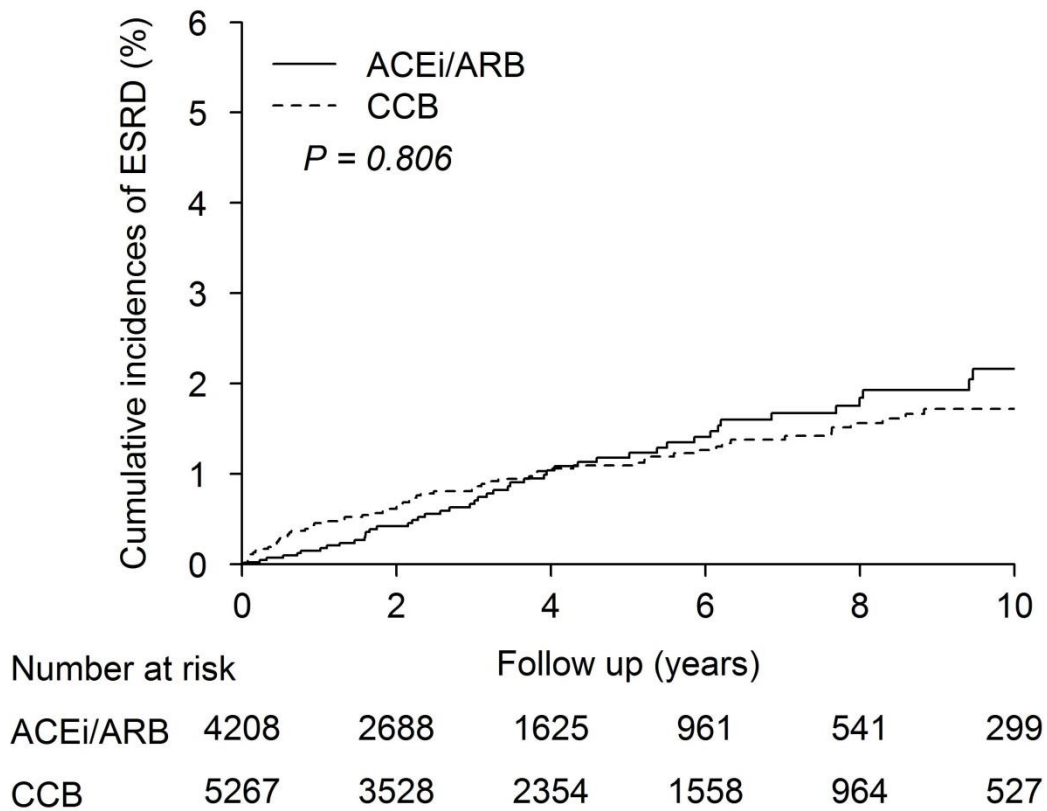

FIGURE S5: Cumulative incidence of ESRD in patients with liver cirrhosis before propensity score matching that was analyzed using the modified log-rank test with death adjusted as a competing risk event.

TABLE S1: Antihypertensive agents

---

| Drugs                                    |
|------------------------------------------|
| Angiotensin-converting enzyme inhibitors |
| Benazepril                               |
| Captopril                                |
| Cilazapril                               |
| Enalapril                                |
| Fosinopril                               |
| Imidapril                                |
| Lisinopril                               |
| Perindopril                              |
| Quinapril                                |
| Ramipril                                 |
| Angiotensin receptor blockers            |
| Candesartan                              |
| Irbesartan                               |
| Losartan                                 |
| Olmесartan                               |
| Telmisartan                              |
| Valsartan                                |
| Calcium channel blockers                 |
| Amlodipine                               |
| Barnidipine                              |
| Benidipine                               |
| Felodipine                               |
| Isradipine                               |
| Lacidipine                               |
| Lercanidipine                            |
| Nifedipine                               |
| Nicardipine                              |
| Nitrendipine                             |

---

TABLE S2: ICD-9-CM codes for the diagnoses of comorbidities

| Disease                     | Corresponding ICD-9-CM codes                           |
|-----------------------------|--------------------------------------------------------|
| Hepatitis B virus infection | 070.2, 070.3, V02.61                                   |
| Hepatitis C virus infection | 070.41, 070.44, 070.51, 070.54, 070.70, 070.71, V02.62 |
| Alcoholic liver disease     | 571.0-571.3                                            |
| Other chronic hepatitis     | 571.40, 571.41, 571.49                                 |
| Hypertension                | 401-405, A260, A269                                    |
| Diabetes mellitus           | 249-250                                                |
| Congestive heart failure    | 428                                                    |
| Hyperlipidemia              | 272                                                    |

TABLE S3: Baseline characteristics of cirrhotic patients with ascites

| Characteristics             | ACEi/ARB ( <i>n</i> = 356) | CCB ( <i>n</i> = 356) | <i>P</i> value |
|-----------------------------|----------------------------|-----------------------|----------------|
|                             | <i>n</i> (%)               | <i>n</i> (%)          |                |
| Age, years, median (IQR)    | 69.93 (57.31–78.38)        | 69.68 (58.49–78.44)   | 0.891          |
| Gender                      |                            |                       | > 0.999        |
| Female                      | 168 (47.2)                 | 168 (47.2)            |                |
| Male                        | 188 (52.8)                 | 188 (52.8)            |                |
| Cause of cirrhosis          |                            |                       |                |
| Hepatitis B virus infection | 50 (14.0)                  | 55 (15.5)             | 0.672          |
| Hepatitis C virus infection | 39 (11.0)                  | 33 (9.3)              | 0.534          |
| Alcoholic liver disease     | 36 (10.1)                  | 49 (13.8)             | 0.165          |
| Other chronic hepatitis     | 131 (36.8)                 | 121 (34.0)            | 0.481          |
| Comorbidity                 |                            |                       |                |
| Hypertension                | 302 (84.8)                 | 290 (81.5)            | 0.271          |
| Diabetes mellitus           | 181 (50.8)                 | 181 (50.8)            | > 0.999        |
| Congestive heart failure    | 89 (25.0)                  | 79 (22.2)             | 0.427          |
| Hyperlipidemia              | 96 (27.0)                  | 101 (28.4)            | 0.738          |
| Drug exposure               |                            |                       |                |
| Beta blockers               | 74 (20.8)                  | 70 (19.7)             | 0.780          |
| Statins                     | 29 (8.2)                   | 28 (7.9)              | > 0.999        |
| Metformin                   | 79 (22.2)                  | 81 (22.8)             | 0.928          |
| Aspirin                     | 62 (17.4)                  | 64 (18.0)             | 0.922          |
| NSAIDs or COX2              | 94 (26.4)                  | 84 (23.6)             | 0.436          |
| ESRD                        | 8 (2.25)                   | 3 (0.84)              | 0.224          |
| Competing mortality         | 134 (37.6)                 | 165 (46.4)            | 0.023          |
| Follow-up years (IQR)       | 1.67 (0.64–3.50)           | 1.61 (0.64–3.49)      | 0.748          |

ACEi: angiotensin-converting enzyme inhibitor; ARB: angiotensin receptor blocker; CCB: calcium channel blocker; COX-2: cyclooxygenase-2 inhibitors; ESRD: end-stage renal disease; IQR: interquartile range; NSAIDs: non-steroidal anti-inflammatory drugs.



TABLE S4: Multivariate cox proportional hazards model analysis of risk of ESRD in cirrhotic patients with ascites after adjustment for competing mortality

|                             | HR (95% CI)       | <i>P</i> value |
|-----------------------------|-------------------|----------------|
| ACEi/ARB vs. CCB users      | 3.25 (0.70–15.08) | 0.132          |
| Age                         | 0.93 (0.90–0.97)  | < 0.001        |
| Male vs. female             | 0.24 (0.06–0.96)  | 0.044          |
| Hepatitis B virus infection | 0.24 (0.03–2.19)  | 0.204          |
| Hepatitis C virus infection | 0.77 (0.11–5.40)  | 0.794          |
| Alcoholic liver disease     | 1.49 (0.44–5.00)  | 0.523          |
| Other chronic hepatitis     | –                 | –              |
| Hypertension                | 0.55 (0.12–2.61)  | 0.454          |
| Diabetes mellitus           | 6.66 (1.32–33.63) | 0.022          |
| Congestive heart failure    | 0.43 (0.06–3.07)  | 0.397          |
| Hyperlipidemia              | 0.34 (0.06–1.98)  | 0.231          |
| Beta blockers               | 0.41 (0.04–4.11)  | 0.452          |
| Statins                     | –                 | –              |
| Metformin                   | 1.35 (0.43–4.28)  | 0.609          |
| Aspirin                     | 0.28 (0.03–2.70)  | 0.273          |
| NSAIDs or COX2              | 1.17 (0.29–4.63)  | 0.825          |

ACEi: angiotensin-converting enzyme inhibitor; ARB: angiotensin receptor blocker; CCB: calcium channel blocker; CI: confidence interval; COX-2: cyclooxygenase-2 inhibitor; ESRD: end-stage renal disease; HR: hazard ratio; NSAIDs: non-steroidal anti-inflammatory drugs.

Table S5. Baseline characteristics of the patients with decompensated liver cirrhosis

| Characteristics             | ACEi/ARB ( <i>n</i> = 453) | CCB ( <i>n</i> = 453) | <i>P</i> value |
|-----------------------------|----------------------------|-----------------------|----------------|
|                             | <i>n</i> (%)               | <i>n</i> (%)          |                |
| Age, years, median(IQR)     | 65.14 (54.31–72.74)        | 65.23 (54.52–73.07)   | .988           |
| Gender                      |                            |                       | >.999          |
| Female                      | 227 (50.1)                 | 227 (50.1)            |                |
| Male                        | 226 (49.9)                 | 226 (49.9)            |                |
| Cause of cirrhosis          |                            |                       |                |
| Hepatitis B virus infection | 85 (18.8)                  | 101 (22.3)            | .217           |
| Hepatitis C virus infection | 89 (19.7)                  | 84 (18.5)             | .735           |
| Alcoholic liver disease     | 60 (13.3)                  | 72 (15.9)             | .300           |
| Other chronic hepatitis     | 191 (42.2)                 | 185 (40.8)            | .736           |
| Comorbidity                 |                            |                       |                |
| Hypertension                | 397 (87.6)                 | 391 (86.3)            | .622           |
| Diabetes mellitus           | 256 (56.5)                 | 240 (53.0)            | .317           |
| Congestive heart failure    | 63 (13.9)                  | 66 (14.6)             | .849           |
| Hyperlipidemia              | 108 (23.8)                 | 109 (24.1)            | >.999          |
| Drug exposure               |                            |                       |                |
| Beta blockers               | 81 (17.9)                  | 89 (19.7)             | .551           |
| Statin                      | 28 (6.2)                   | 23 (5.1)              | .564           |
| Metformin                   | 125 (27.6)                 | 115 (25.4)            | .498           |
| Aspirin                     | 57 (12.6)                  | 53 (11.7)             | .760           |
| NSAIDs or COX2              | 122 (26.9)                 | 125 (27.6)            | .881           |
| ESRD                        | 12 (2.65)                  | 8 (1.77)              | .498           |
| Competing mortality         | 286 (63.1)                 | 313 (69.1)            | .068           |
| Follow-up year (IQR)        | 3.19 (1.41–5.99)           | 2.92 (1.32–5.77)      | 0.707          |

ACEi: angiotensin converting enzyme inhibitor; ARB: angiotensin receptor blocker; CCB: calcium channel blocker; COX-2: cyclooxygenase-2 inhibitor; ESRD: end stage renal disease; IQR: interquartile range; NSAIDs: non-steroidal anti-inflammatory drugs.

TABLE S6: Baseline characteristics of patients with liver cirrhosis taking ACEi/ARB or CCB before propensity score matching

| Characteristics             | ACEi/ARB ( <i>n</i> = 4,208) | CCB ( <i>n</i> = 5,267) | <i>P</i> value |
|-----------------------------|------------------------------|-------------------------|----------------|
|                             | <i>n</i> (%)                 | <i>n</i> (%)            |                |
| Age, years, median (IQR)    | 66.41 (56.29–75.08)          | 67.55 (58.45–75.20)     | < 0.001        |
| Gender                      |                              |                         | < 0.001        |
| Female                      | 1590 (37.8)                  | 2334 (44.3)             |                |
| Male                        | 2618 (62.2)                  | 2933 (55.7)             |                |
| Cause of cirrhosis          |                              |                         |                |
| Hepatitis B virus infection | 664 (15.8)                   | 684 (13.0)              | < 0.001        |
| Hepatitis C virus infection | 666 (15.8)                   | 890 (16.9)              | 0.171          |
| Alcoholic liver disease     | 351 (8.3)                    | 416 (7.9)               | 0.455          |
| Other chronic hepatitis     | 1833 (43.6)                  | 2243 (42.6)             | 0.352          |
| Comorbidity                 |                              |                         |                |
| Hypertension                | 3576 (85.0)                  | 4801 (91.2)             | < 0.001        |
| Diabetes mellitus           | 2015 (47.9)                  | 1737 (33.0)             | < 0.001        |
| Congestive heart failure    | 1025 (24.4)                  | 433 (8.2)               | < 0.001        |
| Hyperlipidemia              | 1337 (31.8)                  | 1133 (21.5)             | < 0.001        |
| Drug exposure               |                              |                         |                |
| Beta blockers               | 1334 (31.7)                  | 1497 (28.4)             | < 0.001        |
| Statins                     | 742 (17.6)                   | 486 (9.2)               | < 0.001        |
| Metformin                   | 1402 (33.3)                  | 1201 (22.8)             | < 0.001        |
| Aspirin                     | 1265 (30.1)                  | 1168 (22.2)             | < 0.001        |
| NSAIDs or COX2              | 1680 (39.9)                  | 2314 (43.9)             | < 0.001        |
| ESRD                        | 47 (1.12)                    | 65 (1.23)               | 0.668          |
| Competing mortality         | 1321 (31.4)                  | 2138 (40.6)             | < 0.001        |
| Follow-up year (IQR)        | 2.99 (1.31–5.69)             | 3.53 (1.47–6.83)        | < 0.001        |

ACEi: angiotensin-converting enzyme inhibitor; ARB: angiotensin receptor blocker; CCB: calcium channel blocker; COX-2: cyclooxygenase-2 inhibitor; ESRD: end-stage renal disease; IQR: interquartile range; NSAIDs: non-steroidal anti-inflammatory drugs.
